# Supplementary material for: Effect of Hydrophobic Chain Length in Amphiphilic Chitosan Conjugates on Intracellular Drug Delivery and Smart Drug Release of Redox-Responsive Micelle
Source: MDPI journal article supplement (doi:10.3390/md22010018), 2023-12-27
Supplement: s1 [file s1]

## Supplementary Material

# Effect of hydrophobic chain length in amphiphilic chitosan conjugates on intracellular drug delivery and smart drug release of redox-responsive micelle

Yuting Yuan <sup>1,2,3</sup>, Wenqiang Tan <sup>1,3,\*</sup>, Yingqi Mi <sup>1,3</sup>, Linqing Wang <sup>1,2,3</sup>, Zhen Qi <sup>4</sup>, Zhanyong Guo <sup>1,2,3,\*</sup>

<sup>1</sup> Key Laboratory of Coastal Biology and Bioresource Utilization, Yantai Institute of Coastal Zone Research, Chinese Academy of Sciences, Yantai 264003, China; [ytyuan@yic.ac.cn](mailto:ytyuan@yic.ac.cn) (Y.Y.); [yqmi@yic.ac.cn](mailto:yqmi@yic.ac.cn) (Y.M.); [linqingwang@yic.ac.cn](mailto:linqingwang@yic.ac.cn) (L.W.);

<sup>2</sup> University of Chinese Academy of Sciences, Beijing 100049, China

<sup>3</sup> Center for Ocean Mega-Science, Chinese Academy of Sciences, Qingdao 266071, China

<sup>4</sup> College of Life Sciences, Yantai University, Yantai 264005, China; [qzqq2022@163.com](mailto:qzqq2022@163.com) (Z.Q.);

\* Correspondence: [zhanyongguo@hotmail.com](mailto:zhanyongguo@hotmail.com) (Z.G.); [wqtan@yic.ac.cn](mailto:wqtan@yic.ac.cn) (W.T.); Tel.: +86-535-2109171 (Z.G.); Fax: +86-535-2109000 (Z.G.)

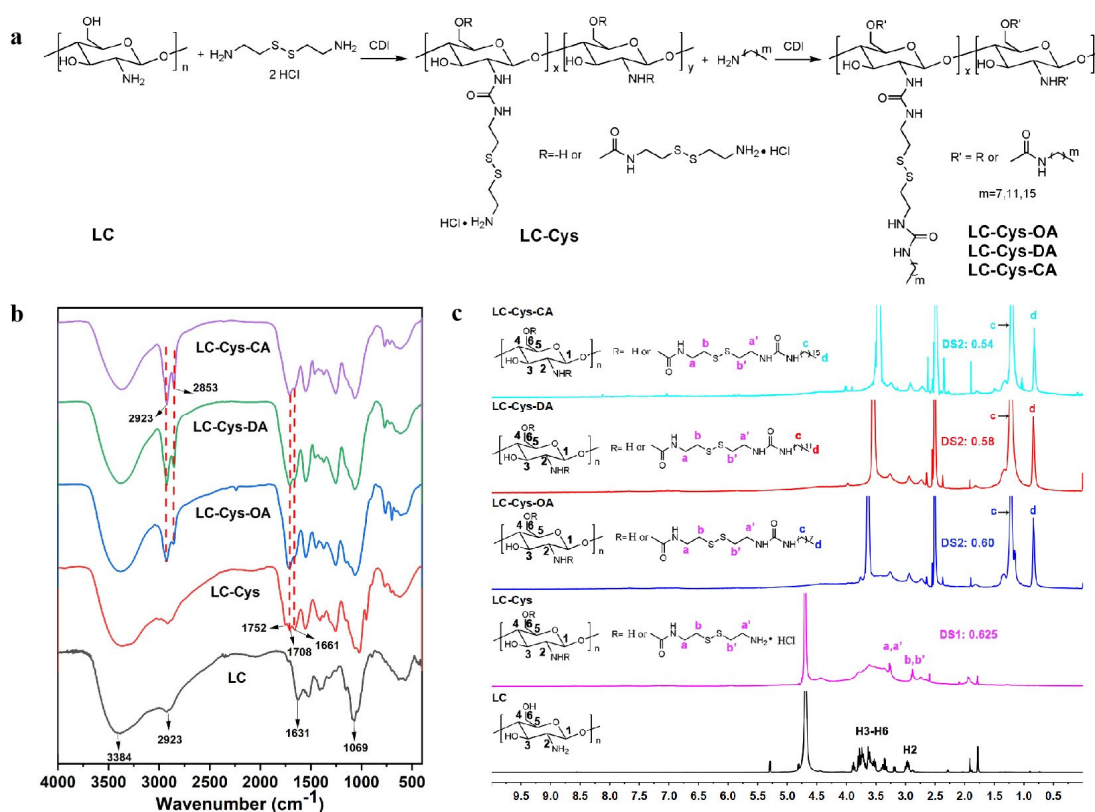

**Figure. S1.** Synthetic route for amphiphilic LC-Cys-OA / LC-Cys-DA / LC-Cys-CA conjugates (a), FTIR

(b) and <sup>1</sup>H NMR spectra (c) of LC and amphiphilic conjugates.

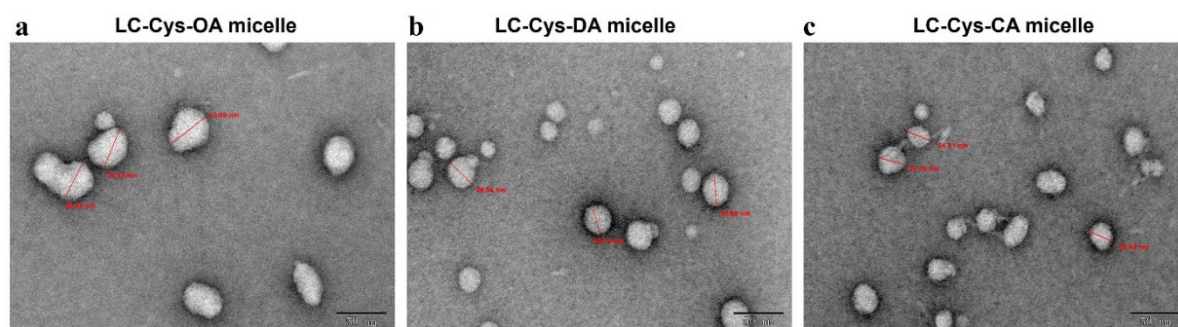

**Figure. S2.** TEM images of LC-Cys-OA, LC-Cys-DA and LC-Cys-CA micelles.

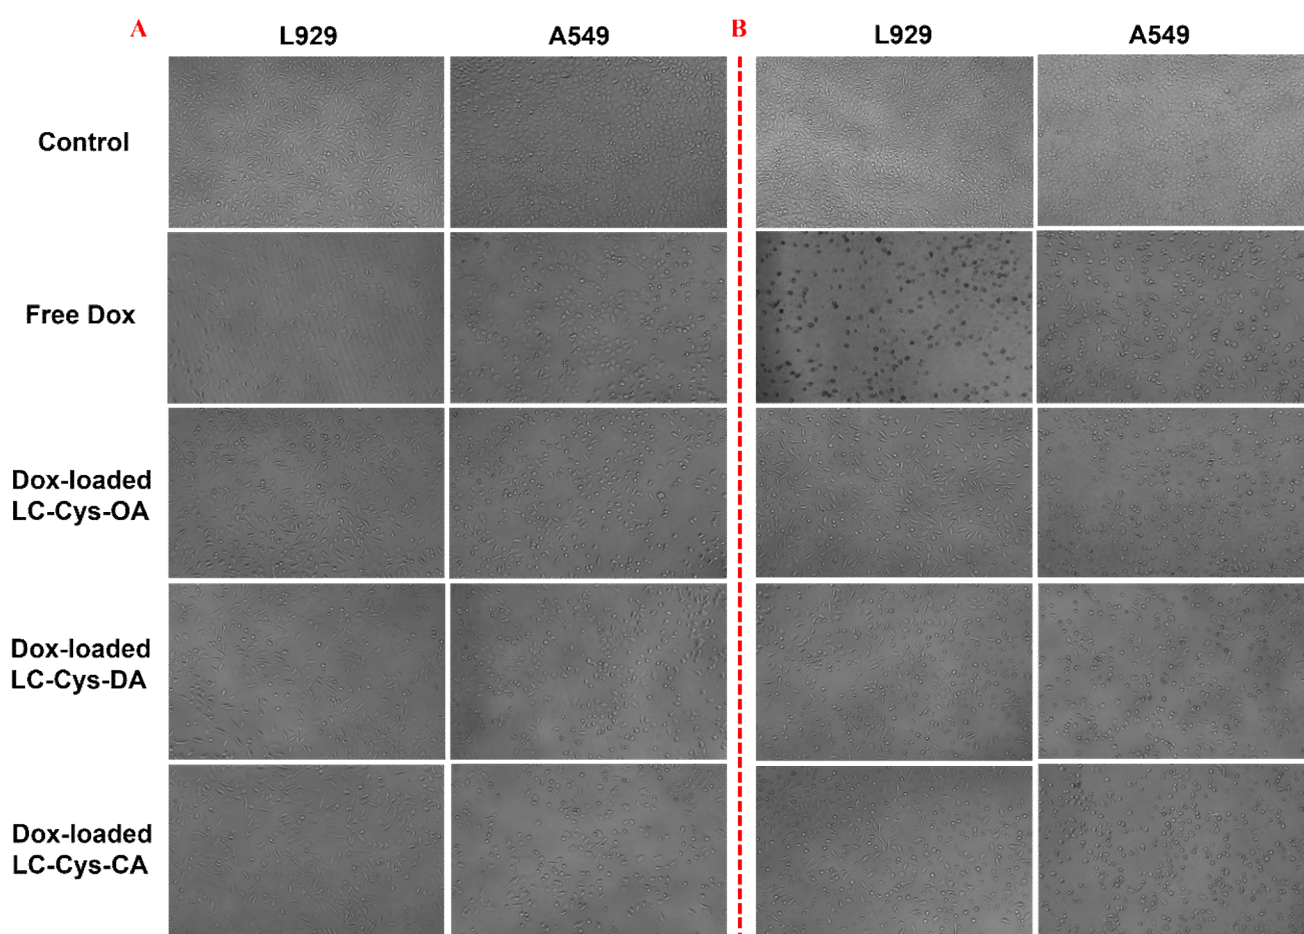

**Figure. S3.** The morphology of L929 cell and A549 cell dealt with free Dox and Dox-loaded LC-Cys-OA, Dox-loaded LC-Cys-DA and Dox-loaded LC-Cys-CA micelles for 24 h (A) and 48 h (B).
